# Supplementary material for: A two-component molecular hybrid with enhanced emission characteristics and mechanoresponsive luminescence properties
Source: Royal Society of Chemistry journal article supplement (doi:10.1039/d1ce00465d), 2021-01-01
Supplement: d1ce00465d1.pdf [file d1ce00465d1.pdf]

## A two-component molecular hybrid with enhanced emission characteristics and mechanoresponsive luminescence properties

Jian-Jun Liu,<sup>\*a</sup> Shu-Biao Xia<sup>a</sup>, Teng Liu<sup>a</sup>, Jia-Ming Liu<sup>b</sup>, and Fei-Xiang Cheng<sup>\*a</sup>

<sup>a</sup> College of Chemistry and Environmental Science, Qujing Normal University, Qujing 655011, China.

<sup>b</sup> School of Metallurgy Engineering, Jiangxi University of Science and Technology, Ganzhou 341000, PR China.

Email: chengfx2019@163.com; jjliu302@163.com

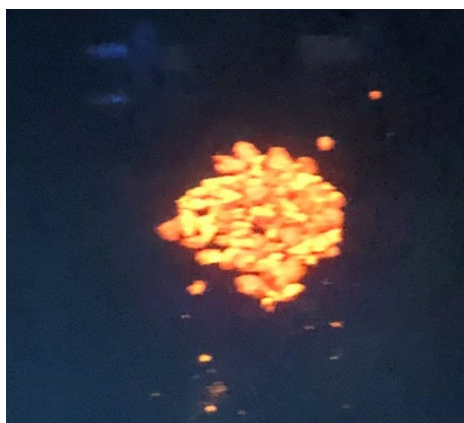

Fig. S1. Photographic image showing fluorescence color and intensity of **C1**.

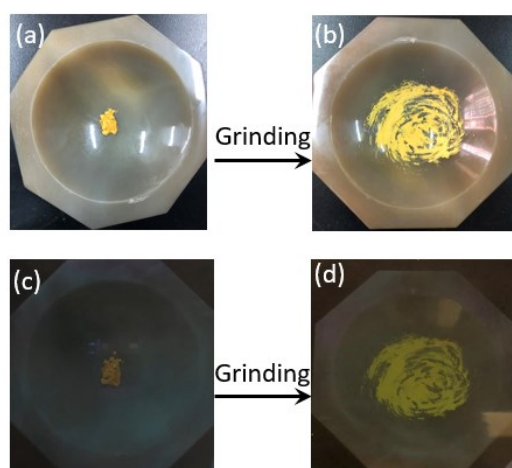

Fig. S2. Photographic images showing fluorescence color of IsoNDI; (a) and (b) under ambient light; (c) and (d) under a 365 light irradiation.

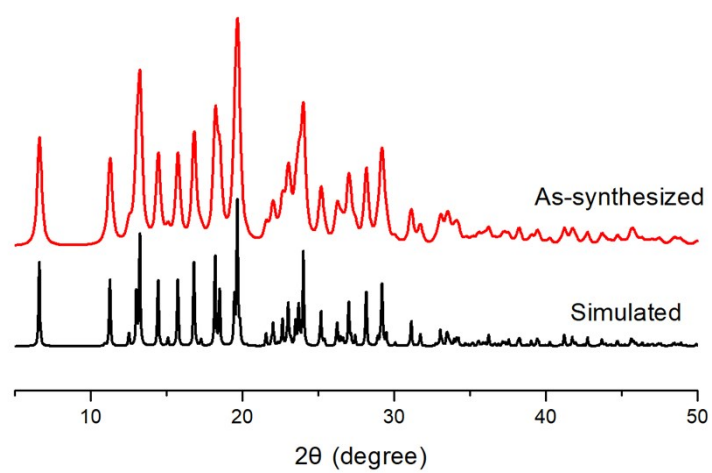

Fig. S3. The PXRD patterns of IsoNDI

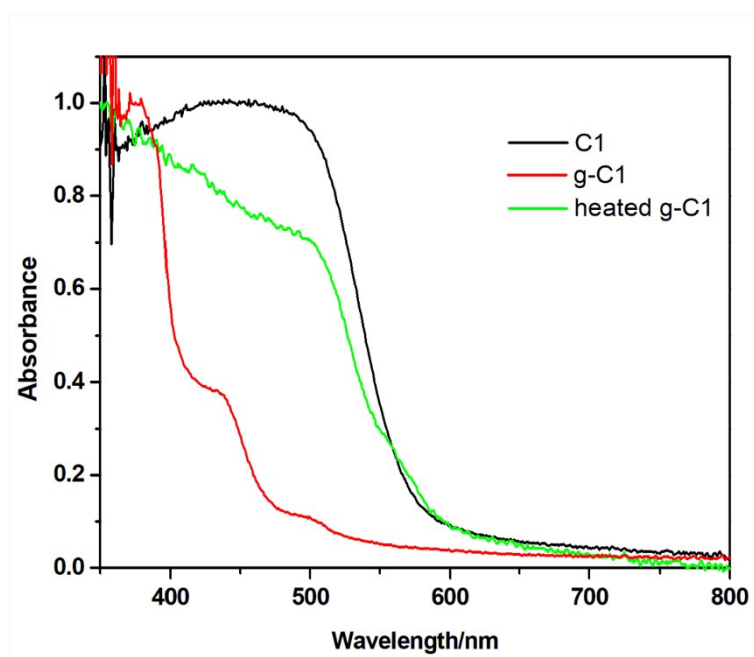

Fig. S4. The absorption spectra of **C1**, **g-C1**, and heated **g-C1**.

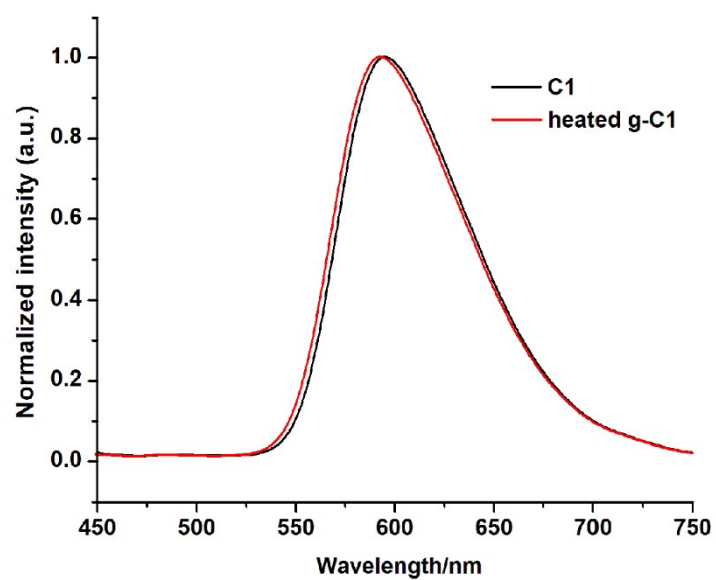

Fig. S5. The Emission spectra of **C1** and heated g-**C1**.
